# Supplementary material
Source: Springer Nature journal article supplement (https://www.springermedizin.de/resource/supplementary/12874_2004_108_MOESM2_ESM.pdf/9433784)

### Diagnosis of UTI

### Localisation of UTI

### Investigation of confirmed UTI

- Yes
- ▒ No
- Unclear

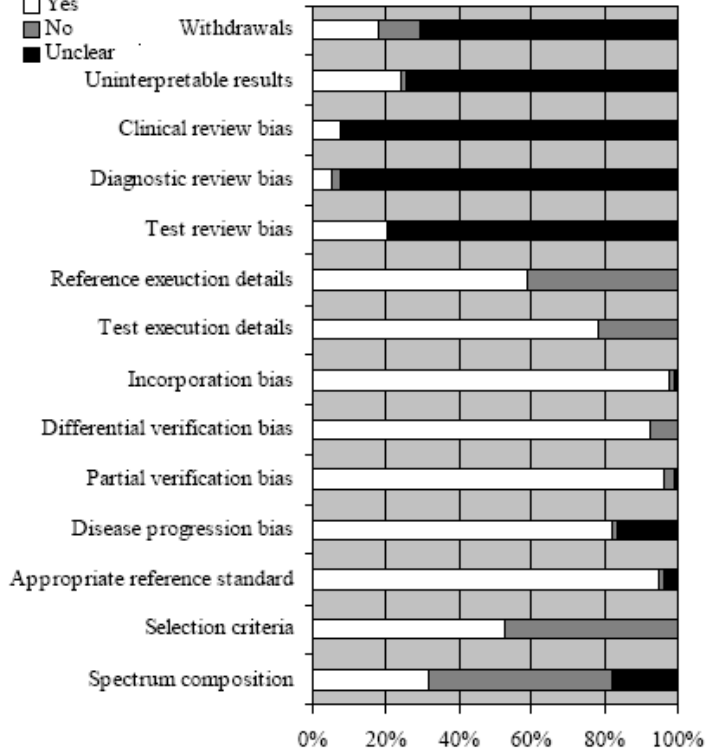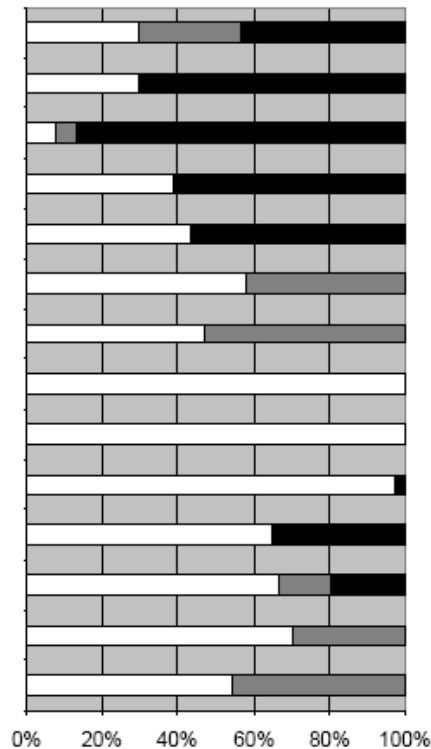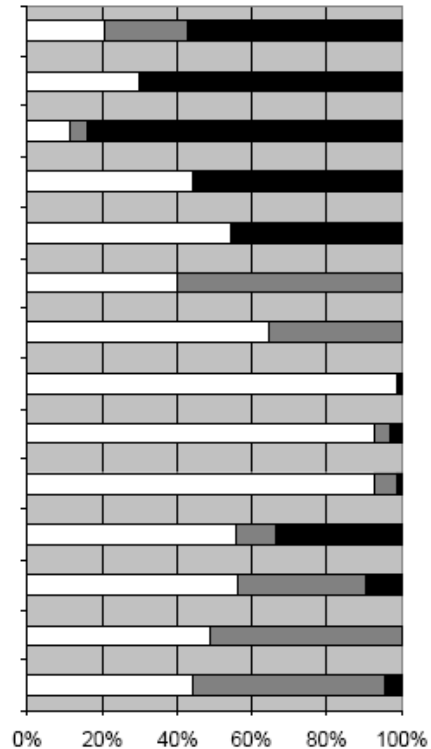

Supplement: MOESM2 [file 9433784]
